# Supplementary material for: Leisure-time physical activity volume, intensity, and duration from mid- to late-life in U.S. subpopulations by race and sex. The Atherosclerosis Risk In Communities (ARIC) Study
Source: Aging (Albany NY). 2020 Mar 13;12(5):4592–602. doi: 10.18632/aging.102916 (PMC7093185; doi:10.18632/aging.102916)
Supplement: Supplementary Tables [file aging-12-102916-s001..pdf]

## SUPPLEMENTARY TABLES

**Supplementary Table 1. Estimated mean differences with (lower, upper) 95% confidence bounds in the average weekly duration of LTPA (in h) by retirement status for women and men across ~5-yr age groups.**

|                | Age group                                    |                                             |                                             |                                            |                                            |                                           |
|----------------|----------------------------------------------|---------------------------------------------|---------------------------------------------|--------------------------------------------|--------------------------------------------|-------------------------------------------|
|                | 45-49 yr<br>295 retired;<br>1251 not retired | 50-54 yr<br>218 retired;<br>714 not retired | 55-59 yr<br>184 retired;<br>169 not retired | 60-64 yr<br>138 retired;<br>80 not retired | 65-69 yr<br>109 retired;<br>42 not retired | 70-75 yr<br>47 retired;<br>17 not retired |
| Women (n=4371) | 0.3 (-0.1, 0.8)                              | -0.6 (-9.9, 0.0)                            | 0.1 (-0.7, 0.8)                             | -0.5 (-1.4, 0.5)                           | 0.1 (-1.4, 1.5)                            | 1.5 (-1.0, 3.9)                           |
| Men (n=3224)   | 0.0 (-0.1, 0.5)                              | 0.4 (-0.3, 1.1)                             | 0.4 (-1.3, 1.1)                             | 0.6 (-2.1, 0.9)                            | 1.1 (-0.5, 2.7)                            | <b>2.5 (0.2, 4.8)*</b>                    |

\*  $p < .05$ .

**Supplementary Table 2. Estimated mean differences with (lower, upper) 95% confidence bounds in the average weekly intensity of LTPA (in MET) by retirement status for women and men across ~5-yr age groups.**

|                | Age group                                    |                                             |                                             |                                            |                                            |                                           |
|----------------|----------------------------------------------|---------------------------------------------|---------------------------------------------|--------------------------------------------|--------------------------------------------|-------------------------------------------|
|                | 45-49 yr<br>295 retired;<br>1251 not retired | 50-54 yr<br>218 retired;<br>714 not retired | 55-59 yr<br>184 retired;<br>169 not retired | 60-64 yr<br>138 retired;<br>80 not retired | 65-69 yr<br>109 retired;<br>42 not retired | 70-75 yr<br>47 retired;<br>17 not retired |
| Women (n=4371) | 0.3 (0.0, 0.6)                               | -0.3 (-0.6, 0.1)                            | 0.1 (-0.5, 0.6)                             | -0.2 (-0.9, 0.4)                           | <b>0.4 (-0.1, 0.9)†</b>                    | <b>1.5 (0.3, 2.7)*</b>                    |
| Men (n=3224)   | 0.6 (-0.1, 1.3)                              | 0.4 (-0.1, 0.9)                             | 0.3 (-0.3, 0.9)                             | -0.2 (-1.1, 0.7)                           | 0.7 (-0.2, 1.6)                            | 0.7 (-0.7, 2.1)                           |

\*  $p < .05$ . †  $p < .10$ .
